# Supplementary material
Source: MDPI journal article supplement (https://www.mdpi.com/2073-4344/14/1/16)
Supplement: s1 [file s1 › catalysts-2736849-supplementary.pdf]

Supplementary data

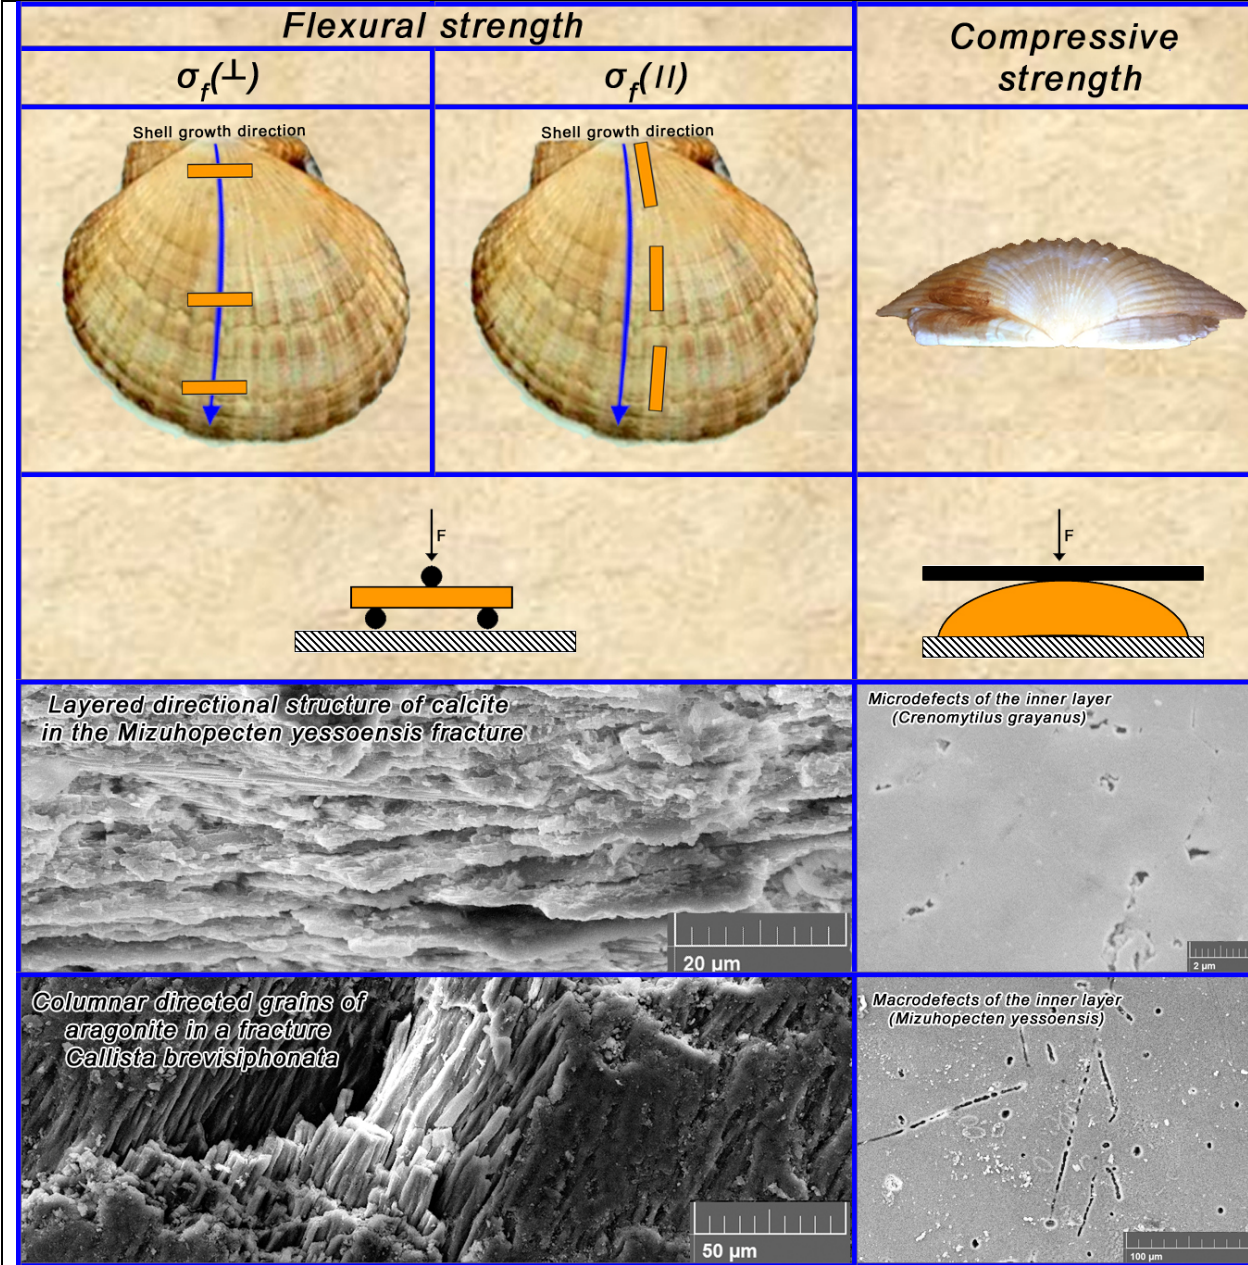

Figure S1. Supplementary. Strength Measurement Method

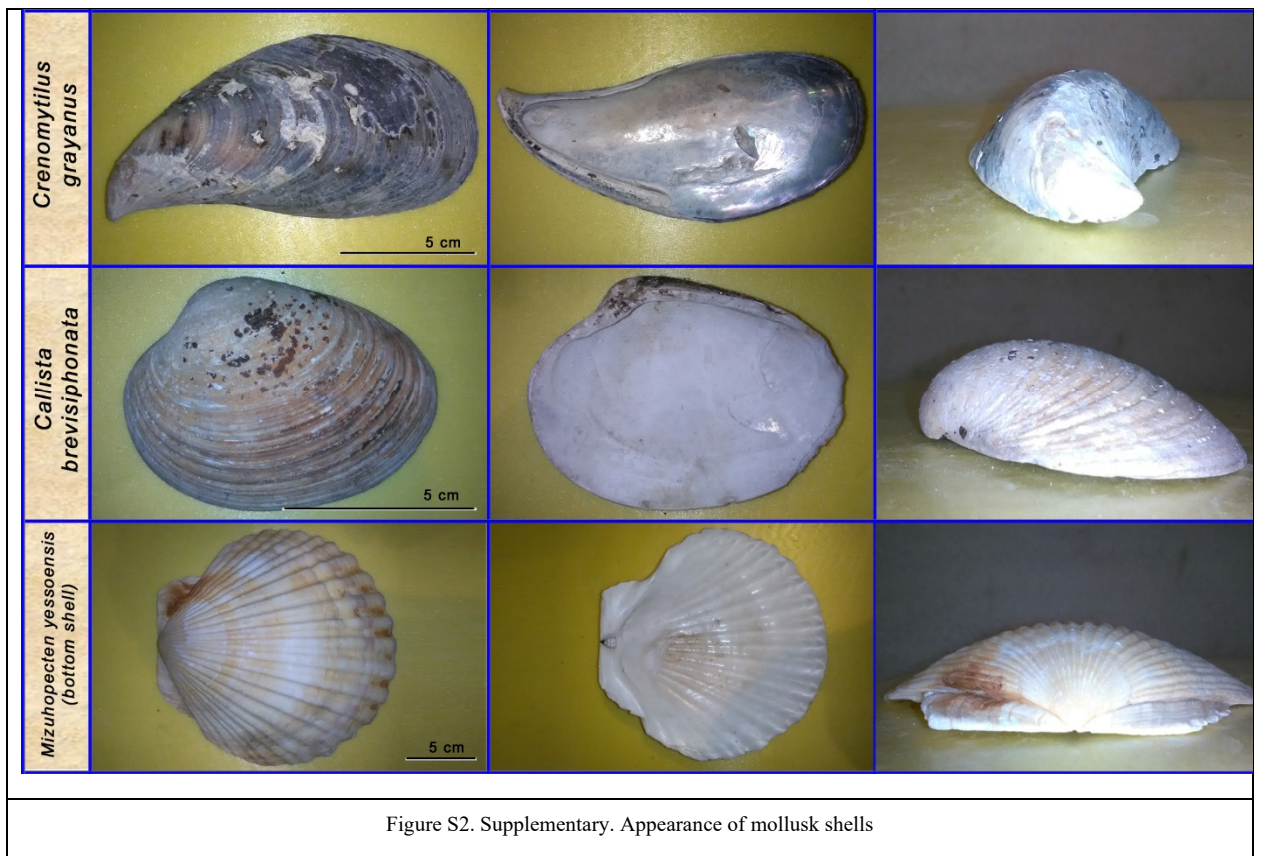

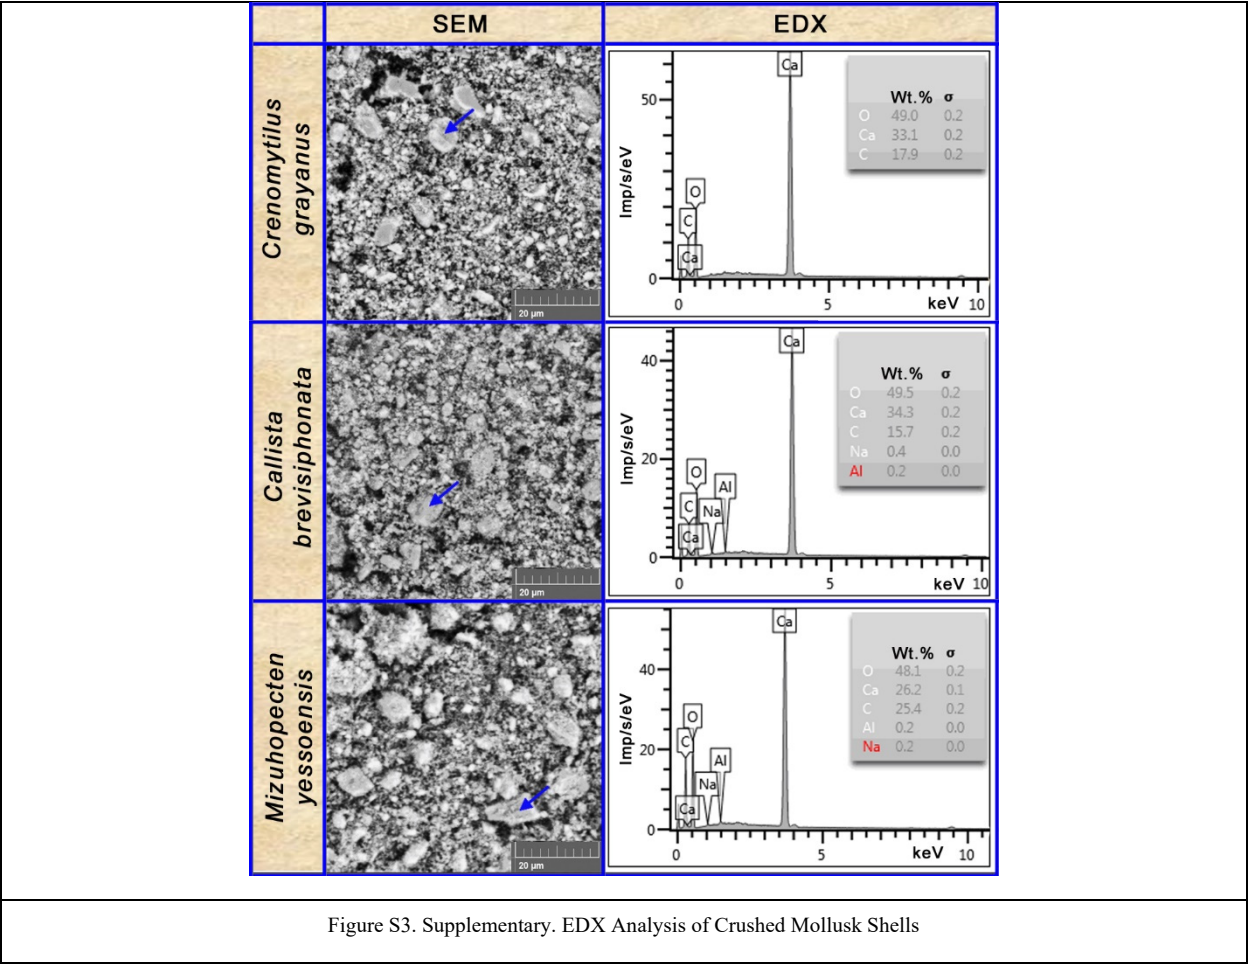

Figure S3. Supplementary. EDX Analysis of Crushed Mollusk Shells
